# Supplementary material for: Destabilization of EpCAM dimer is associated with increased susceptibility towards cleavage by TACE
Source: PeerJ journal article supplement (doi:10.7717/peerj.11484), 2021-05-21

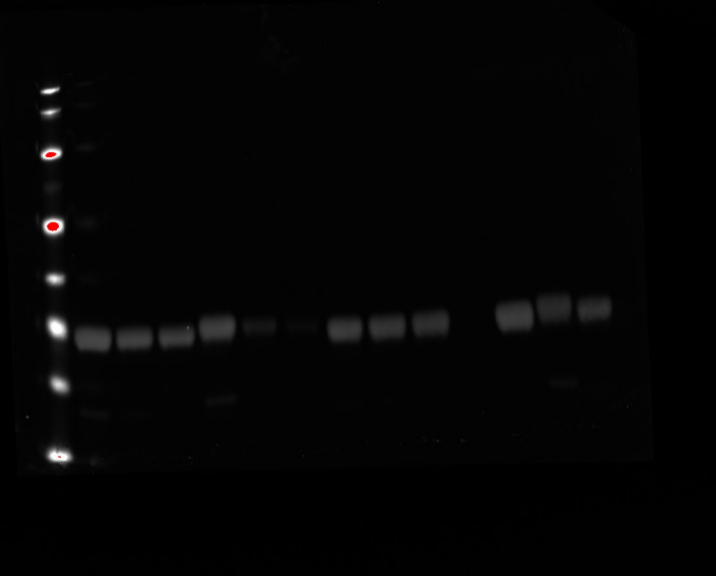

Supplement: Fig_3_A_Alexa_647_3.pdf [file Fig_3_A_Alexa_647_3.pdf]
