# Supplementary material for: Destabilization of EpCAM dimer is associated with increased susceptibility towards cleavage by TACE
Source: PubMed Central journal article supplement (PMC8142927; doi:10.7717/peerj.11484), 2021-05-21

*[Faint, illegible handwritten text at the top of the page]*

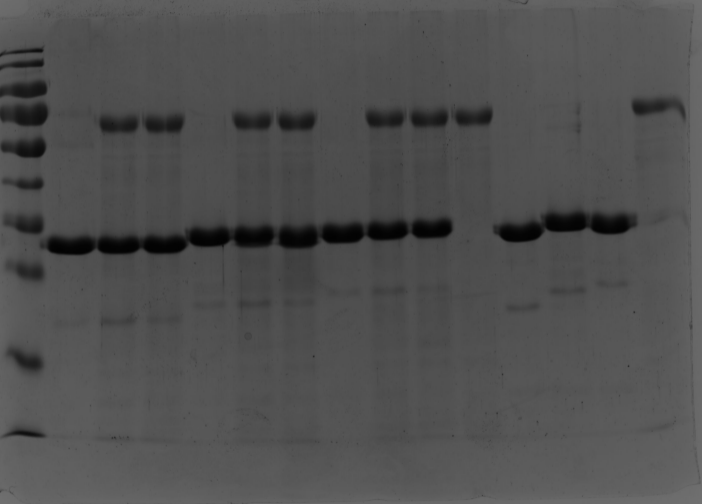

Supplement: peerj-09-11484-s010.pdf [file peerj-09-11484-s010.pdf]
